# Supplementary material for: The Immunoregulatory Effect of Mechanical Stress on Three-dimensional Cultured Mesenchymal Stem Cells After Extensive Expansion
Source: Research Square preprint supplement (doi:10.21203/rs.3.rs-889481/v1), 2021-09-20
Supplement: Supplementary file 1 [file 2f5ba0e452cb849a75ec6174.docx]

**Supplementary Data**

**The Immunoregulatory effect of mechanical stress on three-dimensional cultured mesenchymal stem cells after** **extensive expansion**

Fang-Ying Du1†, Na Zhao2†, Lei Bao3†, Jing Lei3, An-Qi Liu4, Ying-Feng Gao4, Li-Hui Bao4, Hua Ni4, Feng Zhou3,4*, Xiao-Rui Yu1*, Cheng-Hu Hu1,2*

1 Department of Biochemistry and Molecular Biology, School of Basic Medical Sciences, Xi'an Jiaotong University, Xi'an, China;

2 Institute for Stem Cell & Regenerative Medicine, The Second Affiliated Hospital of Xi'an Jiaotong University, Xi'an, China;

3 Department of Obstetrics and Gynecology, Xi'an No. 4 Hospital, Affiliated Guangren Hospital, School of Medicine, Xi'an Jiaotong University, Xi'an, China;

4 Xi'an Institute of Tissue Engineering and Regenerative Medicine, Xi'an, China.

**Correspondence:**

Dr. Cheng-Hu Hu (E-mail: chenghu@xiterm.com), Dr. Xiao-Rui Yu (E-mail: xiaoruiy@mail.xjtu.edu.cn) and Dr. Feng Zhou (Email: zhoufengz28@163.com), 76 West Yanta Road, Xi’an 710000, Shaanxi, China.

† Fang-Ying Du, Na Zhao, Lei Bao contributed equally to this work.

**
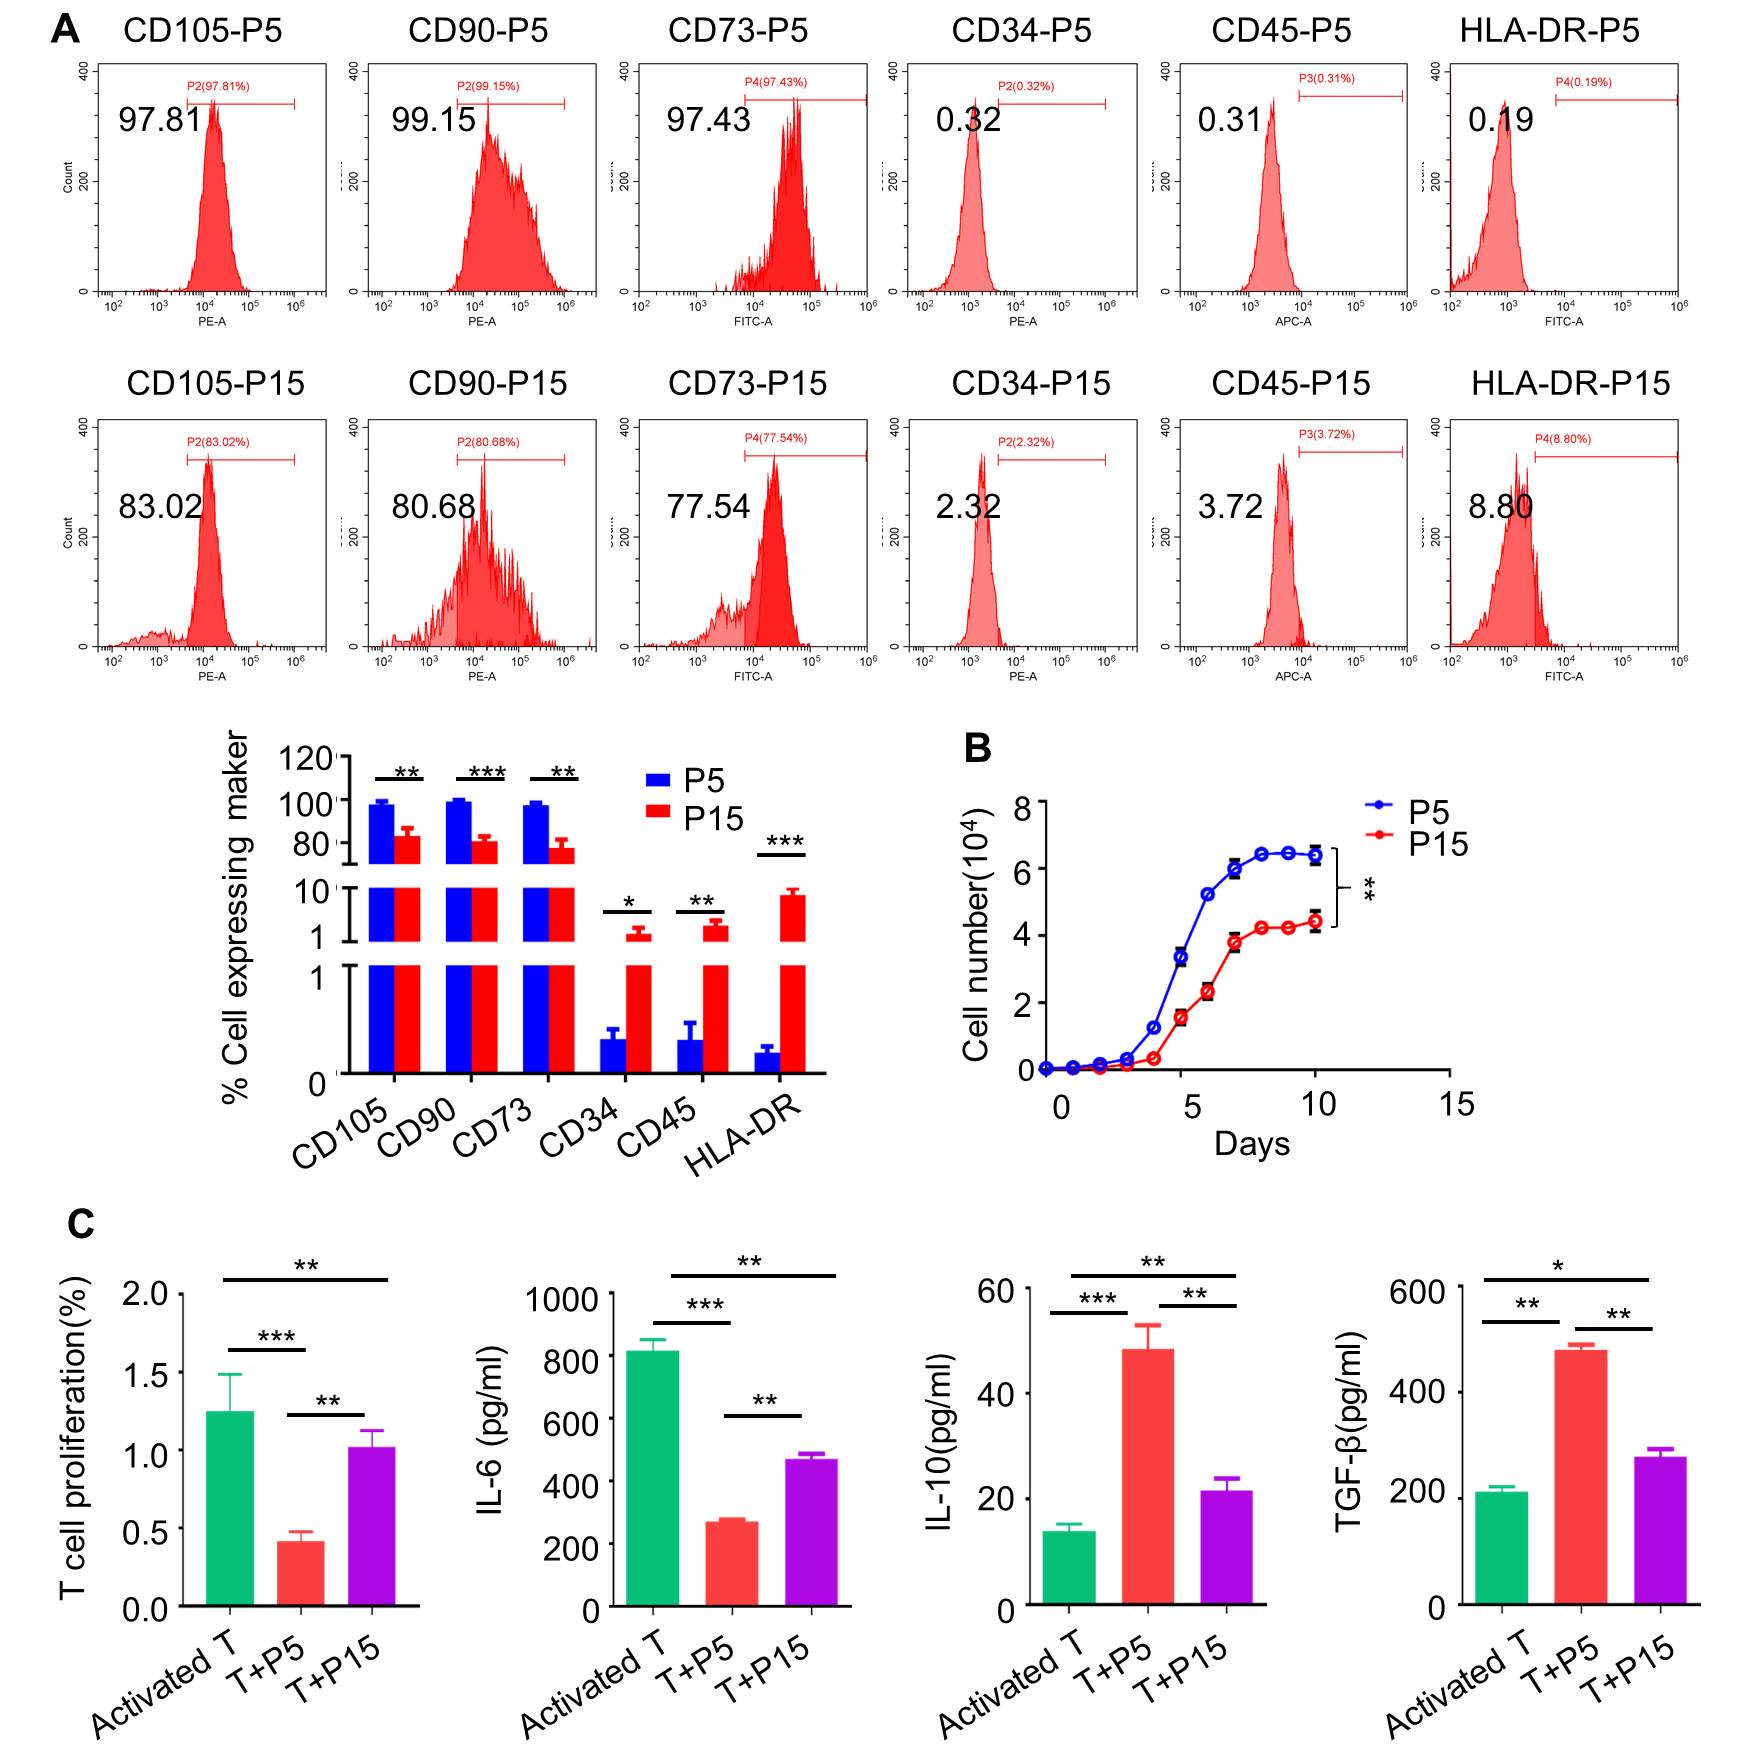
**

**Figure S1. Long-term cultured UC-MSCs decreased expression of MSCs-specific surface antigens and immunoregulation.** (A) UC-MSCs were incubated with antibodies for human CD73, CD105, CD90, HLA-Ⅱ, CD34 and CD45 at 4 °C. The samples (P5 and P15) were measured by flow cytometric analysis. (B) Cell proliferation was analyzed with CCK-8 and the diagram of the method that UC-MSCs were co-cultured with activated CD3+ T cells. (C) Cell proliferation was analyzed with cell CCK-8. IL-6, IL-10 and TGF-β in cell supernatant of UC-MSCs co-cultured with activated CD3+ T cells were detected by ELISA (values were shown as mean ± SD, n = 3 per group).


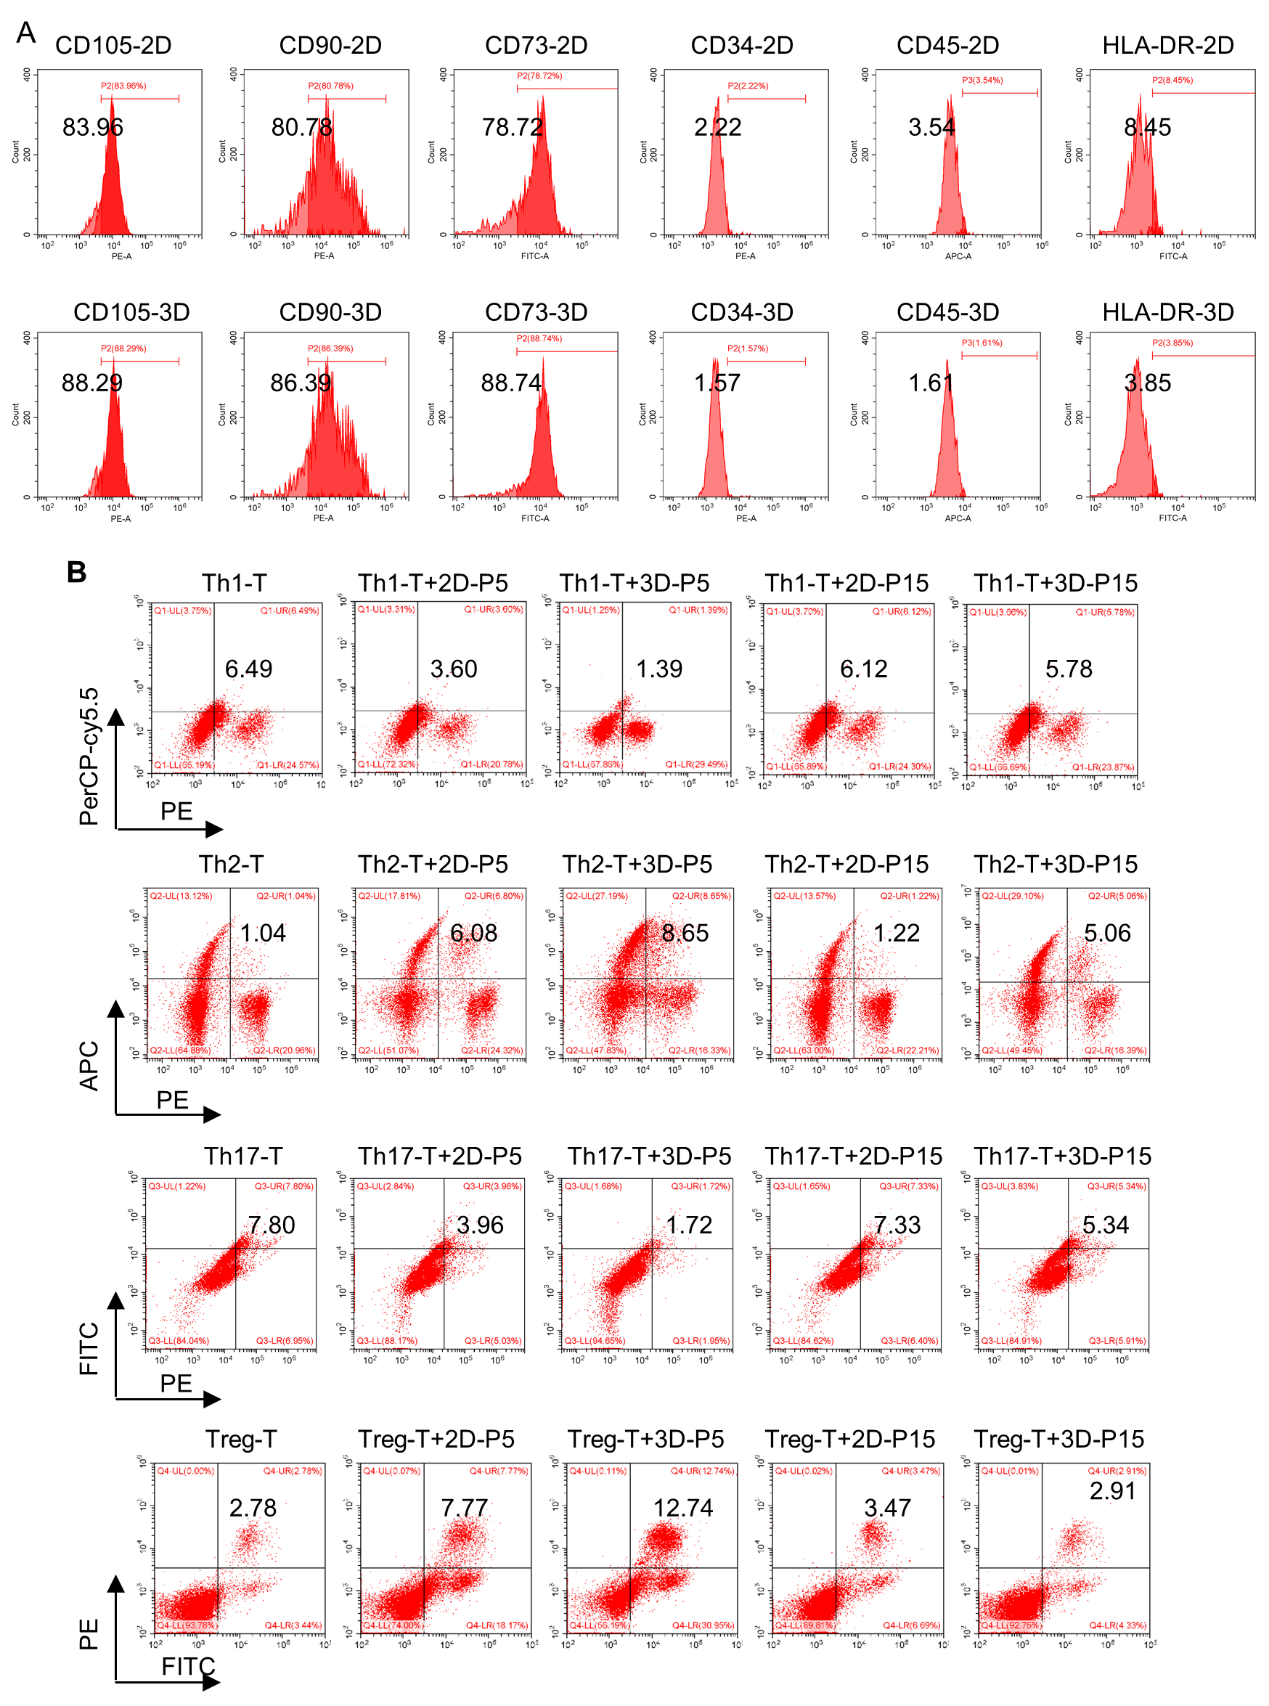


**Figure S2.** (A) The original FACS of surface markers for the Figure 1B. (B) The original FACS of T cells for the Figure 1G.


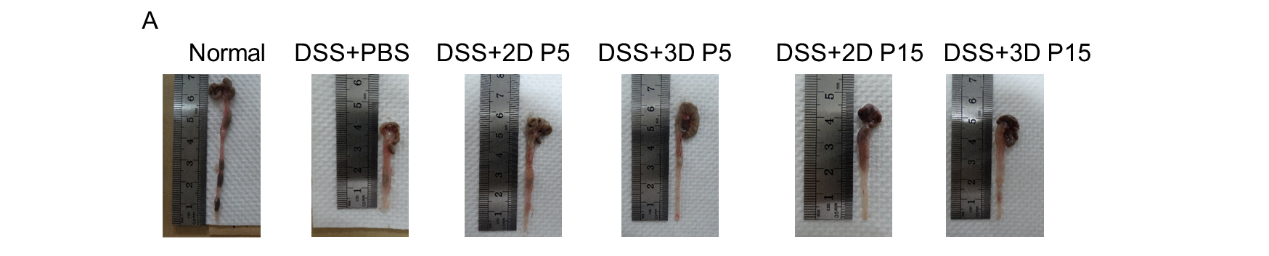


**Figure S3.** (A) The original photos of colon for the Figure 2C.


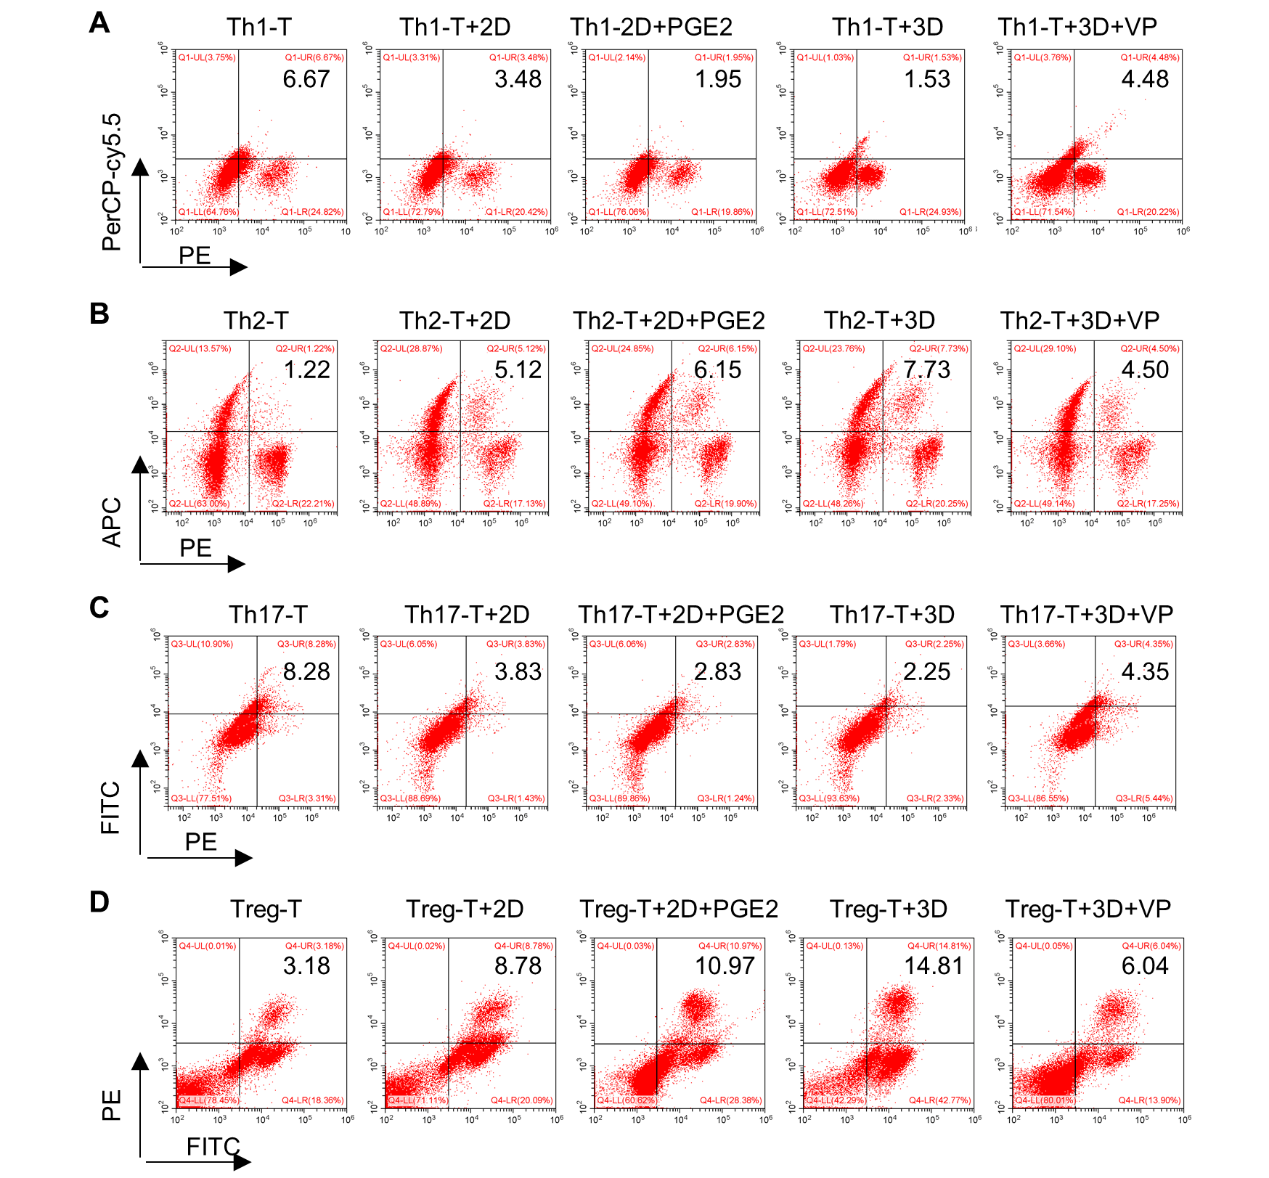


**Figure S4.** (A-D) The original FACS of T cells for the Figure 5.


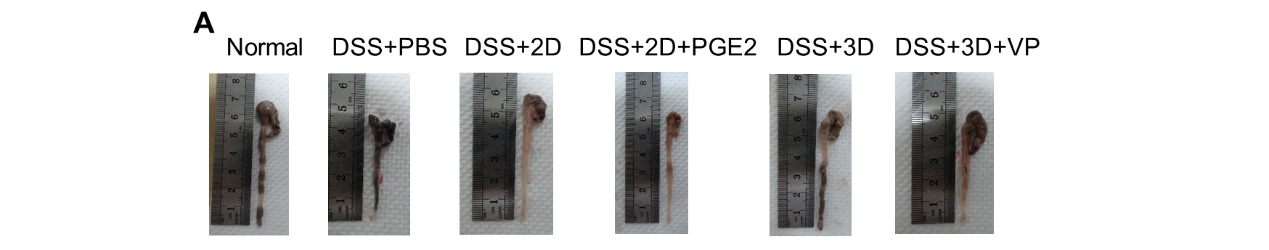


**Figure S5.** (A) The original photos of colon for the Figure 6C.
